# Supplementary material for: Induction of durable remission by dual immunotherapy in SHIV-infected ART-suppressed macaques
Source: PubMed Central journal article supplement (PMC11022498; doi:10.1126/science.adf7966), 2024-02-29
Supplement: NIHMS1984029-supplement-supplemental_materials.pdf [file NIHMS1984029-supplement-supplemental_materials.pdf]

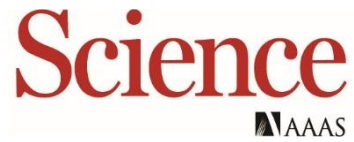

## Supplementary Materials for

### **Induction of durable remission by dual immunotherapy in SHIV-infected ART-suppressed macaques**

So-Yon Lim *et al.*

Corresponding author: James B. Whitney, whitnejc@bc.edu

DOI: 10.1126/science.adf7966

#### **The PDF file includes:**

Materials and Methods  
Figs. S1 to S12  
Tables S1 to S3  
References

#### **Other Supplementary Material for this manuscript includes the following:**

MDAR Reproducibility Checklist (.pdf)

## Materials and Methods

### Animals

Thirty-six outbred 4-5-year-old specific pathogen-free (SPF) rhesus monkeys (35 males and 1 female) were used in Studies 1 (n=20) and 2 (n=16). All animals were screened to exclude the MHC class I alleles *Mamu-A\*01*, *B\*08*, and *B\*17* associated with enhanced virologic control (29-31). Monkeys were housed at the Wisconsin National Primate Research Center (WNPRC). Monkeys were maintained according to the guidelines of the NIH Guide to the Care and Use of Laboratory Animals. The animal studies described were approved by the Wisconsin National Primate Research Center Institutional Animal Care and Use Committee.

### SHIV infection and ART regimen

Animals were infected with 500 tissue culture infective doses (TCID<sub>50</sub>) of SHIV-AD8, as described (32). The ART regimen, daily subcutaneous administration (1 ml per kilogram of body weight) of preformulated antiretroviral cocktail (5 mg/ml of tenofovir disoproxil fumarate (TDF), 40 mg/ml of emtricitabine (FTC), and 2.5 mg/ml of dolutegravir (DTG)) was initiated on day 52 (Study 1) and day 56 (Study 2) post infection and continued for 72 (Study 1) and 69 (Study 2) weeks (33). Animals were assigned to groups on the basis of age, body weight, viral load at study entry, SHIV RNA copies/ml on ART, AUC, CD4<sup>+</sup> and CD8<sup>+</sup> T cell counts, and CD4<sup>+</sup>/CD8<sup>+</sup> T cell ratios across groups.

### N-803 and bNAb treatment

In Study 1, Groups 1, 2, and 3 (n=5 per group) received N-803 alone, the V3 glycan supersite on HIV-1 Env-binding bNAb 10-1074 alone, or N-803 in combination with 10-1074, respectively. The control group (n=5) received vehicle. N-803 was dose-escalated in 10 RMs (Groups 1 and 3) with subcutaneous (SC) administration every week. The initial two doses of N-803 were 25 µg per kilogram of body weight followed by two doses at 50 µg per kilogram of body weight, a dose at 75 µg per kilogram of body weight and then a dose at 100 µg per kilogram of body weight. Two doses of 10-1074 at 10 mg per kilogram of body weight were administered in 10 RMs (groups 2 and 3) intravenously at 24 hours after the fourth and fifth N-803 doses. In Study 2, treatment group (n=8) received N-803 in combination with two bNAbs, the V3 glycan supersite on HIV-1 Env-binding bNAb 10-1074 and a bNAb specific for the CD4-binding site of HIV-1 Env (3BNC117). N-803 was dosed at the same concentration and frequency as in Study 1. Three doses of 10-1074 and 3BNC117 (10 mg of each antibody per kilogram of body weight) were administered every other week when the first dose of bNAbs was administered 24 hours after the second N-803 dose. The control group (n=8) received vehicle. At 70 days (Study 1) and 84 days (Study 2) after the last dose of 10-1074 and/or 3BNC117, ART was discontinued in all groups. Blood samples were collected at 24, 48, and 72 hours after each dose to monitor activation of immune cell subsets. Tissues including lymph node and colorectal mucosa were biopsied prior to the first treatment and after the last dose from each group of monkeys. After cessation of ART, 3 ml of blood was collected and processed over Ficoll on days 3, 7, and 10 and then weekly to monitor viral rebound. We included all animals in all analyses and confirmed all experimental findings were reliably reproduced. Technical staff were blinded during data acquisition and unblinded for analysis.

### Lymphocyte staining and analysis

For Study 1, 100  $\mu$ l of whole blood was stained with following antibody panels: NK cell panel: anti-CD3 (SP34.2), anti-CD8 (SK1), anti-NKG2A (Z199, Beckman Coulter), anti-CD16 (3G8), anti-CD56 (NCAM16.2), anti-CD69 (TP1.55.3, Beckman Coulter), anti-NKG2D (BAT221, Miltenyi Biotec), and anti-NKp30 (REA823, Miltenyi Biotec); T cell panel: anti-CD3, anti-CD4 (L200), anti-CD8, anti-CD20 (2H7), anti-CD25 (M-A251), anti-CD28 (CD28.2, Beckman Coulter), anti-CD69, and anti-CD95 (DX2). Cells were treated with BD Pharm Lyse (BD Bioscience) for RBC lysis, fixed with 2% paraformaldehyde. For Study 2, PBMCs were isolated by Ficoll density gradient centrifugation. Approximately  $5 \times 10^5$  PBMCs were stained with each of the following panels of antibodies: NK cell panel: anti-CD3, anti-CD8, anti-NKG2A, anti-CD16, anti-CD20, anti-CD56, anti-CD69, anti-NKG2D, anti-NKp30 and anti-NKp46; T cell panel: anti-CD3, anti-CD4, anti-CD8, anti-CD20, anti-CD25, anti-CD28, anti-CD69, anti-CD95. All antibodies are from BD Biosciences unless otherwise indicated. More detailed information on antibodies used is shown in table S3.

### Lymphocyte phenotyping analysis

Cells were treated with ACK lysis buffer (Gibco) for further RBC lysis, fixed with 2% paraformaldehyde. Stained cells were acquired on a FACS LSRII flow cytometer (BD Biosciences), and analyzed using FlowJo Software v. 10 (FlowJo, LLC, Ashland, OR). All events were gated first on FSC singlets and then lymphocytes. NK cells were identified as  $CD3^-CD8^+NKG2A^+$ , and CD16 and CD56 were used to define subsets.  $CD4^+$  and  $CD8^+$  T cells were identified as  $CD3^+CD20^-$ , and CD28 and CD95 were used to define subsets (34). All activation markers, including CD25 and CD69, were measured as a percent of lymphocyte population of interest.

### bNAb concentration in plasma and PK analysis

Plasma levels of the bNAbs, 3BNC117 and 10-1074 were determined using a validated luciferase-based neutralization assay in TZM-bl cells as described (35). Briefly, plasma samples were tested using a primary 1:20 dilution with a fivefold titration series against HIV-1 Env pseudoviruses Q842.d12 and X2088\_c9, which are highly sensitive to neutralization by 3BNC117 and 10-1074, respectively. Standard curves were generated using 3BNC117 and 10-1074 clinical drug products and included in every assay set-up using a primary concentration of 10  $\mu$ g/ml with a fivefold titration series. Plasma concentrations of 3BNC117 and 10-1074 for each sample were then calculated as follows: plasma  $ID_{50}$  titer (dilution)  $\times$  3BNC117  $IC_{50}$  or 10-1074  $IC_{50}$  titer ( $\mu$ g/ml) = plasma concentration of 3BNC117 or 10-1074 ( $\mu$ g/ml).

### CD4<sup>+</sup> T cell cytometric sorting

Cryopreserved samples of PBMC, LMNC, and GMMC biopsies were thawed at 37°C in RPMI 1640 containing 10% fetal bovine serum (FBS) and benzonase (Millipore) at 25 U/ml. Cells were resuspended in 1X phosphate-buffered saline (PBS) containing LIVE/DEAD Fixable Aqua Dead Cell Stain (Life Technologies) for 20 min at room temperature in the dark. Cells were washed and stained with the following fluorescently conjugated antibodies: PBMCs and LN: anti-CD3 (SP34.2), anti-CD4 (L200), anti-CD8 (SK1), anti-CD20 (2H7), anti-CD28 (CD28.2), anti-CD45 (D058-1283), anti-CD95 (DX2), anti-CCR7 (150503), anti-ICOS (C398.4A, Biolegend), anti-PD-1 (EH12.2H7, Biolegend), anti-CXCR3 (1C6/CXCR3), and anti-CXCR5 (MU5UBEE, Thermo Fisher); GMMC: anti-CD3, anti-CD4, anti-CD8, anti-CD28, anti-CD45, anti-CD95, and anti-CCR7. After 15 min in the dark, cells were washed, resuspended in ice-cold 1X PBS, and were sorted using a FACS Aria II (BD Bioscience). Sorted  $CD4^+$  T cells were FSC singlets, live,

CD45<sup>+</sup>CD3<sup>+</sup>CD4<sup>+</sup>CD8<sup>-</sup> lymphocytes. Subsets were defined as follows: naïve (CD95<sup>-</sup>CD28<sup>+</sup>CCR7<sup>+</sup>), central memory (CD95<sup>+</sup>CD28<sup>+</sup>CCR7<sup>+</sup>), transitional memory (CD95<sup>+</sup>CD28<sup>+</sup>CCR7<sup>-</sup>), follicular helper T cells (CD95<sup>+</sup>CD28<sup>+</sup>CXCR5<sup>hi</sup>PD-1<sup>hi</sup>), and effector memory (CD95<sup>+</sup>CD28<sup>-</sup>). More detailed information on antibodies used is shown in table S3.

#### Integrated DNA and intact proviral DNA assay (IPDA)

Genomic DNA was isolated from sorted CD4<sup>+</sup> T cells using either a QIAamp DNA blood mini kit or QIAamp DNA micro kit following Manufacturer's instruction. To detect integrated SHIV DNA, we applied the published methods modified for rhesus macaque specific Alu sequences as described (33, 36). Genomic DNA was serially diluted in 10-fold dilutions (1000 to 1 cell equivalents) and applied to the first-round PCR. SIV LTR nested PCR products were then subjected to a standard qRT-PCR. Cell numbers analyzed in each reaction was confirmed by simultaneous q-PCR of GAPDH genes. A cloned cell line, 3D8 containing a single integrated copy of SIV DNA was used as an integration standard. Intact SHIV proviral DNA was quantitated using a novel droplet digital PCR-based method designed to detect intact SHIV genomes, called the SHIV Intact Proviral DNA Assay (IPDA). This assay uses principles similar to those previously described for the analysis of intact HIV-1 and SIV proviruses and includes corrections for 2LTR circles and DNA shearing as described (37, 38). The 3' SHIV IPDA amplicon was the same as the 3' HIV-1 amplicon, whereas the 5' amplicon was in the gag gene.

#### In vivo CD8<sup>+</sup> lymphocyte depletion

Rhesus macaques were depleted of CD8<sup>+</sup> lymphocytes using the MT807R1 monoclonal antibody (Nonhuman Primate Reagent Resource) using the previously described protocol (39). CD4 and CD8 lymphocytes were monitored twice weekly for the first 3 weeks and then weekly throughout the monitoring period. Whole blood was stained with the antibodies anti-CD4 (L200), anti-CD8 (DK25, Dako), and anti-CD3 (SP34.2). The anti-CD8 antibody clone DK25 was used for detection, as described (40). RBCs were lysed using a TQ-Prep (Beckman Coulter), fixed in 2% formaldehyde, acquired on a FACS Calibur (BD Biosciences), and analyzed using FlowJo Software. All antibodies are from BD Biosciences unless otherwise indicated. More detailed information on antibodies used is shown in table S3.

#### Intracellular cytokine staining

The measurement of intracellular cytokines (TNF- $\alpha$ , IFN- $\gamma$ , IL-2, granzyme B, and CD107a) was performed as previously described (41). Thawed PBMCs were rested at 37°C for 3 hours before stimulation. Approximately 3 $\times$ 10<sup>6</sup> cells were stimulated with either dimethyl sulfoxide alone (unstimulated) or overlapping peptide pools (2  $\mu$ g/ml) covering the entire SIVmac239 Gag protein (NIH AIDS Reagent Program, catalog no. 6204) and anti-CD49d antibodies (1  $\mu$ g/ml; BD Biosciences). Cells were incubated with anti-CD107 antibody (H4A3) for 6 hours, with GolgiStop (BD Bioscience) and GolgiPlug (BD Bioscience) added 1 hour after stimulation. Cells were stained with LIVE/DEAD Fixable Aqua Dead Cell Stain (Invitrogen) followed by antibodies conjugated for surface staining: anti-CD4 (L200), anti-CD8 (SK1), anti-CD28 (L293), anti-CD45 (D058-1283), and anti-CD95 (DX2). Cells were permeabilized with BD Cytotfix/Cytoperm for 20 min followed by intracellular staining using: anti-CD3 (SP34.2), anti-CD69 (TP1.55.3, Beckman Coulter), anti-TNF- $\alpha$  (Mab11), anti-IFN- $\gamma$  (B27), anti-IL-2 (MQ1-17H12), and anti-granzyme B (GB-11). All antibodies are from BD Biosciences unless otherwise indicated. More detailed information on antibodies used is shown in table S3. The value of percent cytokine-positive cells in unstimulated samples was subtracted from the corresponding value of stimulated samples.

### Antibody-dependent cellular cytotoxicity (ADCC)

ADCC activity was measured as described (42). CEM.NKR-CCR5-sLTR-Luc target cells were infected with VSV G-pseudotyped SHIV-AD8 $\Delta$ vif or SIVmac239 $\Delta$ vif by spinoculation in the presence of 40  $\mu$ g/ml of Polybrene. Two days post infection, infected cells were incubated with diluted plasma and an CD16 expressing NK cell line at a 10:1 effector-to-target ratio for 8 hours. The loss of Luc activity was used as to indicate antibody-mediated killing of infected cells. Infected target cells incubated with NK cells in the absence of antibody were used to measure maximal Luc activity and uninfected target cells cultured with NK cells were used to determine background.

### TZM.bl pseudovirus neutralization assay

Virus neutralization was measured using a luciferase-based assay in TZM.bl cells as previously described (32). Briefly, plasma dilutions were performed in duplicate using 96-well flat-bottom plates. Two hundred TCID<sub>50</sub> of SHIV-AD8 was added to each well prior to incubation for 1 hour at 37°C. TZM.bl cells were seeded at  $1 \times 10^4$  cells per well with D-MEM media containing DEAE-dextran (Sigma, St. Louis, MO) at a final concentration of 11  $\mu$ g/ml. After a 48-hour incubation, 150  $\mu$ l of supernatant was removed and replaced with 100  $\mu$ l of Bright-Glo luciferase reagent (Promega, Madison, WI). Following lysis, 150  $\mu$ l of the sample lysate was measured using a Victor 3 luminometer (Perkin Elmer). The 50% inhibitory dose (ID<sub>50</sub>) titer was calculated as described. Data were analyzed with software provided by the CAVD Vaccine Immunology Statistical Center.

### TZM.bl neutralization assay with SHIV-AD8 challenge stock

Neutralization against SHIV-AD8 was assessed as described (43) using TZM-bl cells and 4 ng of SHIV p27 per well. TZM-bl cells were seeded to flat-bottom 96-well plates the day before each neutralization assay at a density of  $1.5 \times 10^4$  cells per well. Plasma dilutions and viruses were incubated for 1 hour at 37°C before being combined with reporter cells. Luciferase activity in TZM-bl cells was measured 3 days later using BriteLite Plus substrate (Perkin Elmer).

### Viral Suppression Assay

Viral suppression assay was performed as described with some modifications (20). Briefly, frozen PBMC isolated animals at 3 days prior to SHIV infection were thawed and CD4<sup>+</sup> T cells were enriched using CD4<sup>+</sup> T Cell Isolation Kit NHP (Miltenyi). Enriched CD4<sup>+</sup> T cells were plated at  $5 \times 10^5$  cells per well in 12-well plates and stimulated with 10  $\mu$ g/ml of concanavalin A, (Sigma) and 20 U/ml of rhIL-2 (Roche via NIH AIDS reagent resource #136) in RPMI supplemented with 10% FBS (R10+) for 3 days. Activated CD4<sup>+</sup> T cells were harvested and subjected to a Ficoll gradient to remove dead cells and debris. Fraction of the activated CD4<sup>+</sup> T cells were taken for flow cytometry staining and from the rest distributed across 15-ml conical tubes at  $1 \times 10^5$  cells per tube for infection. From the virus stock of  $1.110^{-3}$  MOI, 25  $\mu$ l was added to the falcon tube with 75  $\mu$ l of CD4<sup>+</sup> T cells in R10+ media supplemented with 20 U per ml of IL-2 and incubated at 37°C for 3 hours with intermediate mixing. At the same time, CD8<sup>+</sup> T cells were isolated using CD8<sup>+</sup> T Cell Isolation Kit NHP (Miltenyi) from frozen PBMCs isolated 7 weeks prior to N-803+bNAb treatment (47 weeks after ART start) and 149 days after ART release from the same animals used above for CD4<sup>+</sup> T cells isolation. After 3 hours of infection, CD4<sup>+</sup> T cells were washed three times with R10+ media and plated with respective CD8<sup>+</sup> T cells to obtain CD4:CD8 ratios of 1:4, 1:2, and 1:1 and without CD8<sup>+</sup> T cells in R10+ media supplemented with 20 U/ml of IL-2 in 96 well plate. On postinfection days 3, 5, and 7, plates were centrifuged for 1400g for 5 min and supernatant was collected for qRT-PCR analysis. Fresh R10+ media supplemented with

20 U/ml of IL-2 was added to replenish the wells at respective time points. At day 7, cells were harvested and stained with LIVE/DEAD Fixable Aqua Dead Cell Stain (Invitrogen) followed by conjugated antibodies for surface staining: anti-CD4 (L200), anti-CD8 (SK1), anti-CD20 (2H7), anti-CD25 (M-A251), anti-CD28 (CD28.2), anti-CD95 (DX2), anti-HLA-DR (G46-6). Intracellular stain was performed by permeabilizing cells with BD Cytotfix/Cytoperm for 20 min and stained with anti-CD69 (TP1.55.3, Beckman Coulter) and anti-CD3 (SP34.2). All antibodies are from BD Biosciences unless otherwise indicated. Infection rate was assessed by supernatant levels of virus by RT-qPCR.

### Viral Dynamic Modeling

The observed viral load (VL) after treatment interruption showed a range of different trajectories (**fig. S12B**). Some were reminiscent of post-treatment control (PTC, e.g., rh2664), whereas others showed a typical peak VL followed by a VL set point (e.g., rh2668, rh2670). We used viral dynamic modeling to find a possible mechanistic explanation for these different patterns, and to relate them to the type of immunotherapy applied to each animal. The VL trajectories showing a set-point are well described by the standard viral dynamic model (44). However, other animals (e.g., rh2654) showed highly oscillatory VL dynamics, which are not well described by the standard mode. We therefore extended them by including an immune response that becomes exhausted at high antigen concentrations. This extension is known as the PTC model (45), which is shown schematically in fig. S6 and is formulated in terms of a system of ordinary differential equations (ODEs). These describe target cells ( $\bar{T}$ , CD4 T cells susceptible to viral infection), infected CD4 T cells ( $\bar{I}$ ) that produce free virus  $\bar{V}$ , and effector cells ( $\bar{E}$ ) that eliminate productively infected cells by cytotoxic and non-cytotoxic effects. The ODEs for  $\bar{T}$ ,  $\bar{I}$ ,  $\bar{V}$ , and  $\bar{E}$  are then given by:

$$\begin{cases} \frac{dT}{dt} = \lambda_T - d_T T - \beta VT \\ \frac{dI}{dt} = \beta VT - d_I I - \kappa EI \\ \frac{dV}{dt} = pI - cV \\ \frac{dE}{dt} = \lambda_E - d_E E + b \frac{EI}{k_B + E + I} - \xi \frac{EI}{k_X + I} \end{cases}$$

In the first equation, target cells,  $T$ , are supplied at a constant rate  $\lambda_T$ , die at per capita rate  $d_T$ , and are infected at rate  $\beta VT$ , where  $\beta$  is the infection rate constant. In the second equation, productively infected cells,  $I$ , die at per capita rate  $d_I$ , and are eliminated by effector cells by cytolytic or non-cytolytic processes at rate  $\kappa EI$ , where  $\kappa$  is the elimination rate constant. In the third equation, virions,  $V$ , are produced at rate  $p$  per infected cell and cleared at rate  $c$  per virion. Finally, in the fourth equation, effector cells enter at a constant rate  $\lambda_E$ , and die at per-capita rate  $d_E$ . When effector cells encounter infected cells, they proliferate at maximal rate  $b$  in a saturated manner, following previously published work (46, 47). Saturation is governed by the parameter  $k_B$ . Finally, the PTC model assumes that effector cells can become exhausted at high antigen concentrations at maximum rate  $\xi$ . The antigen concentration at which exhaustion is at its half-maximum is given by the parameter  $k_X$ .

We make the common assumption that the observed VL has a log-normal distribution with location parameter  $\log(V)$ , and scale parameter  $\sigma$ . VL measurements below the limit of detection of 50 copies per milliliter are treated as left-censored observations. We fit this model to the VL time series from all animals simultaneously using a non-linear mixed effects framework (**fig. S13**). In this method, it is assumed that each animal has unobserved individual parameters, which uniquely

determine the VL trajectory. We used Monolix 2021R2 (Lixoft SAS, a Simulations Plus company) to infer the distributions that gave rise to these individual-level parameters, and to sample from these distributions, conditional on the observed time series. As not all parameters are identifiable from observing merely the VL, we fix some parameters to biologically plausible values, namely  $\overline{c} = 23$  per day,  $\overline{b} = 1000$  per day and  $\overline{d_I} = 0.6$  per day. In addition, we compute the significance of the effect of the immunotherapy pre-ART interruption on the model's parameters using the Wald test.

### Ni-NTA ELISA

Antibody binding to Env trimer experiment was performed as previously described (48). Briefly, Ni<sup>2+</sup>-nitrotriacetic acid (Ni-NTA) coated Hissorb 96-well plates (Qiagen) were coated with 200 ng per well of BG505 SOSIP.664-His-gp140 for 1 hour at RT. After washing unbound trimers away with 0.05% Tween-20-PBS (PBS-T), plates were incubated with plasma samples diluted 1:100 in 1% BSA-PBS and appropriate positive controls (3BNC-117 and 10-1074) at 4°C for ON. After washes with PBS-T, goat HRP-conjugated anti-human IgG (Southern Biotech) was added at 1:2000 dilution in 1% BSA-PBS and then incubated for 45 min at RT. Colorimetric detection was performed using TMB substrate (Pierce) and stopped using 0.8 M H<sub>2</sub>SO<sub>4</sub> (ThermoFisher). Optical densities (OD) were measured at 450 nm using the PowerWave 340 microplate reader.

### Statistical analyses

Analyses of virologic or immunologic data at study entry and comparisons of grouped variables were performed using a non-parametric Kruskal–Wallis *H* test to compare three or more unmatched groups or a Mann–Whitney *U* test to compare differences between two groups. Transformed log<sub>10</sub> SIV RNA levels in plasma were calculated using GraphPad Prism (version 9.0). Changes in values after treatment within groups were analyzed by use of a Wilcoxon matched pairs signed rank test. *P*-values were adjusted for multiple comparisons when more than two groups were compared. All flow cytometry data in this manuscript was analyzed using FlowJo (v10). Background subtraction and formatting of exported data from FlowJo was performed with Pestle (version 2). Statistical analyses of the polyfunctionality and immune cell subset and display of multicomponent distributions were performed using the Simple Presentation of Incredibly Complex Evaluations software (SPICE 6.1). To compare each of the pies as calculated by SPICE, one-sided permutation tests were performed. *P*-values were considered significant if <0.05 after adjustment for multiple comparisons when applicable.

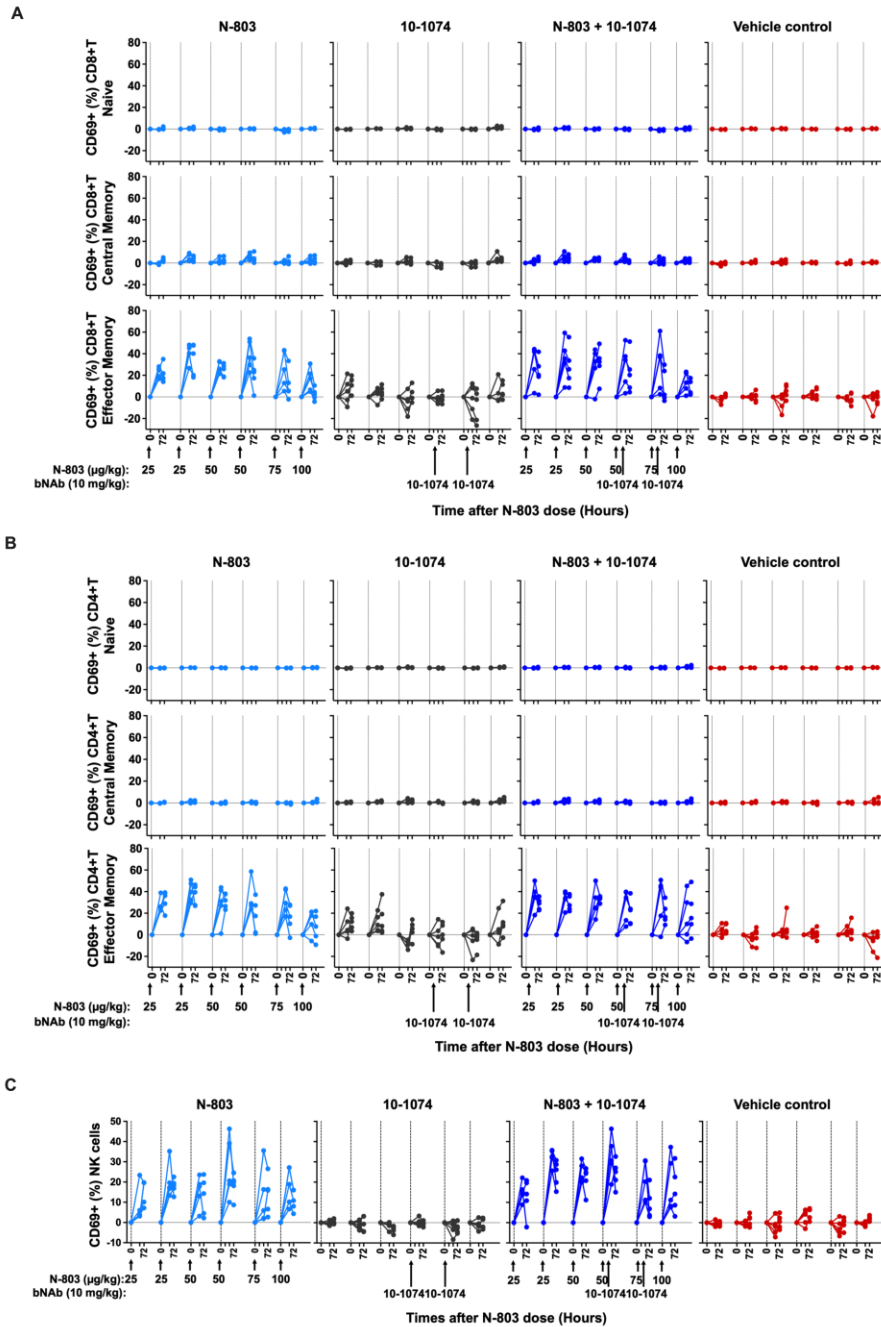

**Fig. S1. Activation of T and NK cells following N-803+10-1074 administration.** Activation of naïve ( $CD95^-CD28^+$ ), central memory ( $CD95^+CD28^+$ ), and effector memory ( $CD95^+CD28^-$ ) populations by cytometric detection of CD69 in (A)  $CD8^+$  T cells and (B) in  $CD4^+$  T cells. CD69 expression within each subset was measured at the time of each dose (baseline) and at 48 and 72 hours after each N-803 dose. (C) Activation of NK cells were monitored by flow cytometric detection of CD69. Changes in CD69 expression are shown as the absolute difference in percent from the day of dose for all immune subsets. Both N-803 and 10-1074 dosing are indicated by black arrows on the *x*-axis.



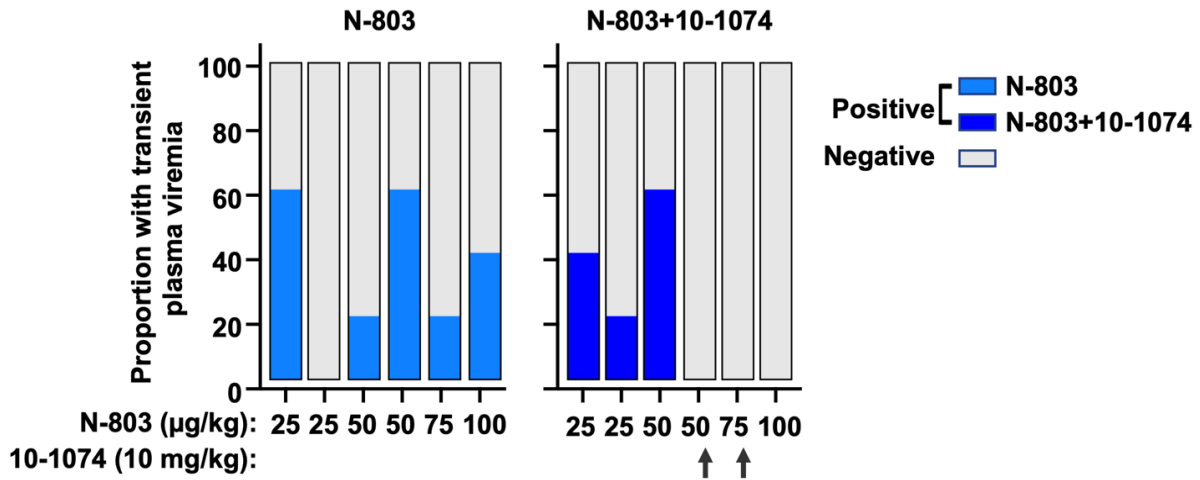

**Fig. S2. Transient plasma viremia induced by N-803 dosing in SHIV-infected monkeys on ART.** The proportion of RMs with detectable plasma viremia (>50 copies/ml) measured at 48 or 72 hours after each N-803 dose are shown. N-803 concentrations at each dose are indicated. Arrows indicate the timing of bNAb dosing at 24 hours after N-803 treatment.

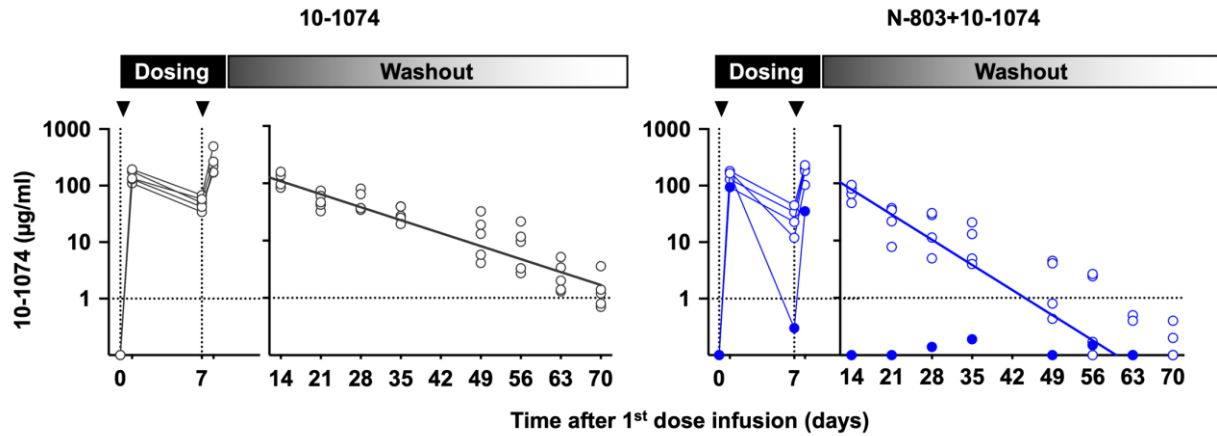

**Fig. S3. Pharmacokinetics of 10-1074 in Study 1.** The plasma concentration of 10-1074 was monitored during dosing (predose and 24 hours post dose) and during the washout period by TZM.bl assay. The RM that developed an ADA response is indicated by closed blue circles. Lines indicate the lower limit of accuracy of the assay (1 µg/ml).

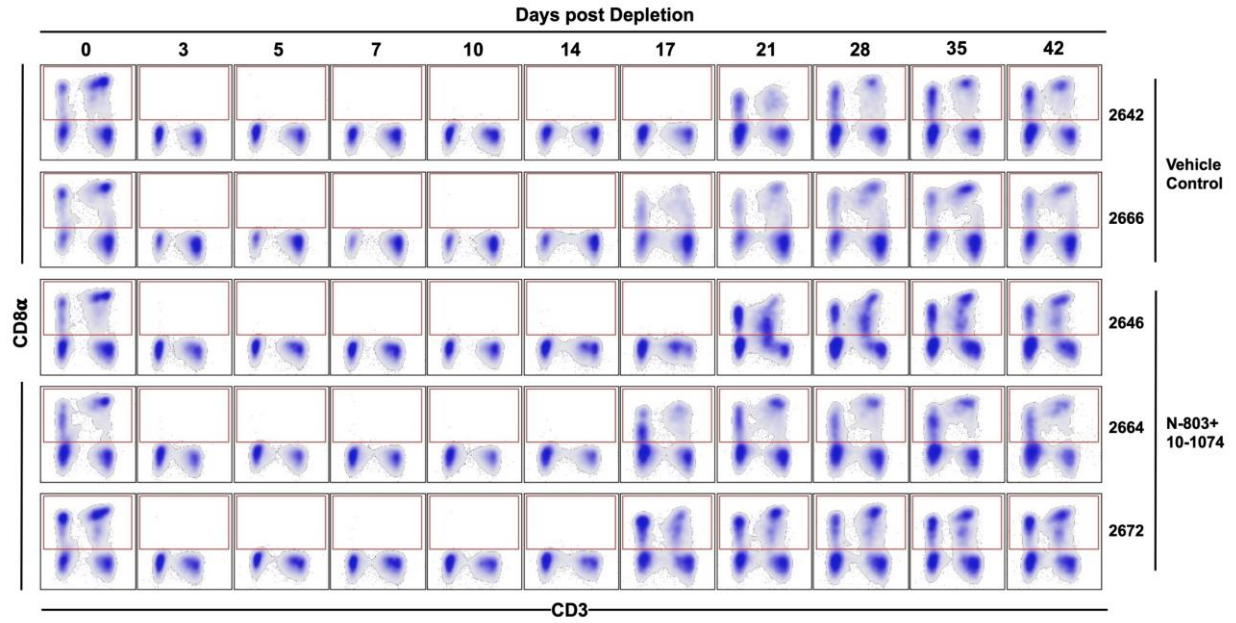

**Fig. S4. In vivo CD8<sup>+</sup> T cell depletion.** CD8<sup>+</sup> T cells were depleted in vivo using the monoclonal antibody MT807R1 in two control macaques and three macaques treated with N-803+10-1074. The presence of CD8<sup>+</sup> T cells in the blood was monitored by flow cytometry.

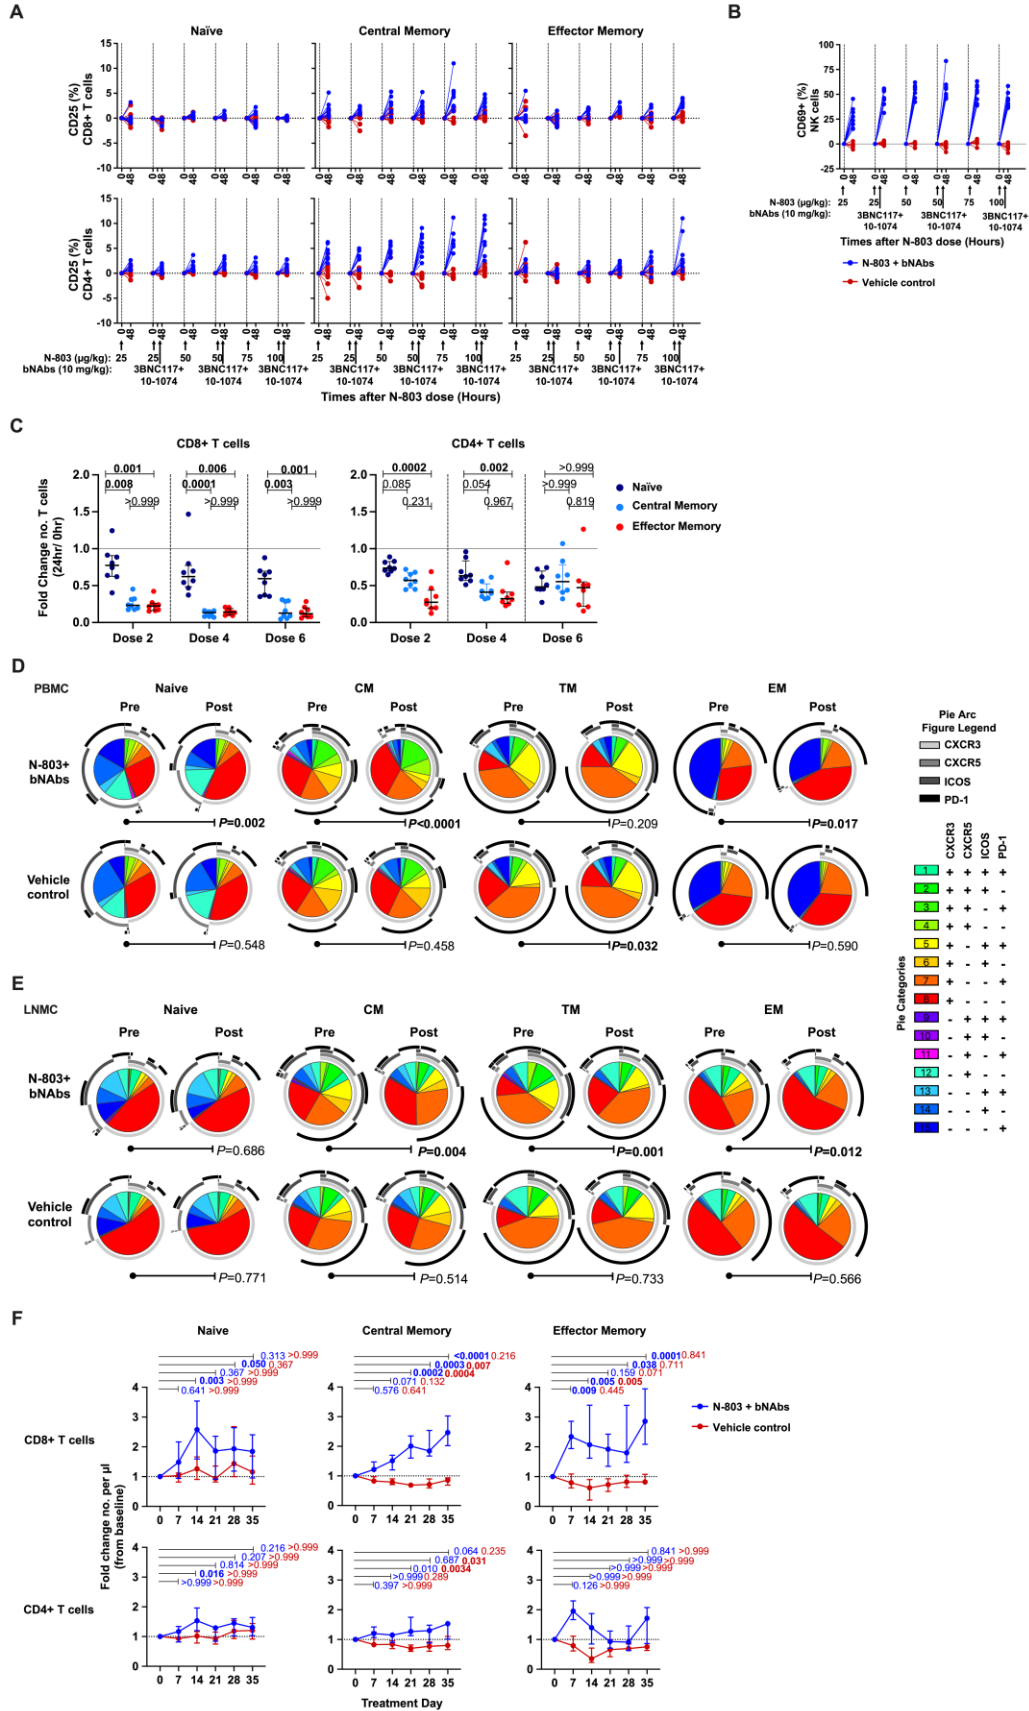

**Fig. S5. Rapid activation, margination, and expansion of CD8<sup>+</sup> and CD4<sup>+</sup> T memory subsets and NK cells following N-803+10-1074+3BNC117 administration.** In Study 2, the expression of CD25 in naïve (CD95<sup>-</sup>CD28<sup>+</sup>), central memory (CD95<sup>+</sup>CD28<sup>+</sup>), and effector memory (CD95<sup>+</sup>CD28<sup>-</sup>) subsets from CD8<sup>+</sup> and CD4<sup>+</sup> T cells was monitored by flow cytometry (A) Activation of NK cells were monitored by flow cytometric detection of CD69 (B) CD25 and CD69 expression within each subset was measured at the time of each dose (baseline) and at 48 hours after each N-803 dose. Changes in CD25 and CD69 expression are shown as the difference in percent from the day of dose for all immune subsets. Both N-803 and 3BNC117+10-1074 dosing is indicated by black arrows on the *x*-axis. Absolute counts of each memory subset of CD8<sup>+</sup> and CD4<sup>+</sup> T cells per microliter of blood were monitored by flow cytometry at the day of dose (baseline) and at 24 hours after doses 2, 4, and 6. The fold change in each memory subsets were calculated by the day of dose to 24 hours after each dose (doses 2, 4, and 6). Data shown as median ± interquartile range (n=8 per group) (C) Boolean-gated frequencies of markers (CXCR3, CXCR5, ICOS, and PD-1) within FlowJo were exported into SPICE. Pie charts and arcs showing different combinations of trafficking or costimulation/activation markers in CD8<sup>+</sup> T memory subsets in (D) peripheral blood and (E) LMNC. *P*-values were computed using a permutation test. (F) Fold changes in each subset of CD8<sup>+</sup> and CD4<sup>+</sup> T cells were calculated and *P*-values comparing CD8<sup>+</sup> and CD4<sup>+</sup> T cell expansion at each treatment day versus day of dose (baseline) are shown for both treated (blue) and control (red) groups. Statistical analysis was performed using the Kruskal–Wallis *H* test followed by Dunn’s test for multiple comparison (C) or a repeated measures two-way ANOVA with Geisser–Greenhouse correction for multiple comparison (F) as required. Adjusted *P*-values are shown.

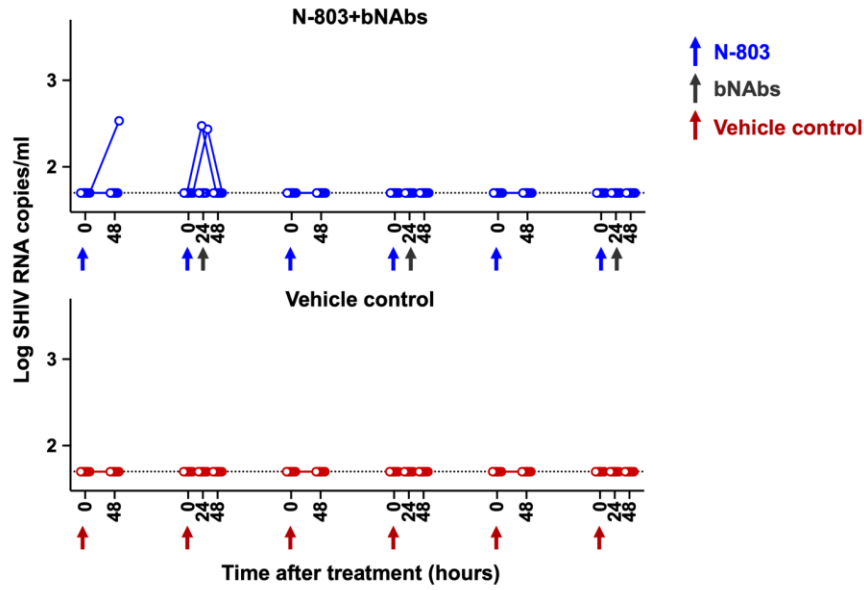

**Fig. S6. Transient plasma viremia induced by N-803 dosing in SHIV-infected monkeys on ART in Study 2.** SHIV RNA copies were monitored in RMs at baseline and 24 and 48 hours following each of six weekly N-803 doses in all treatment and control groups. Arrows indicate the timing of N-803+10-1074+3BNC117 or vehicle dosing.

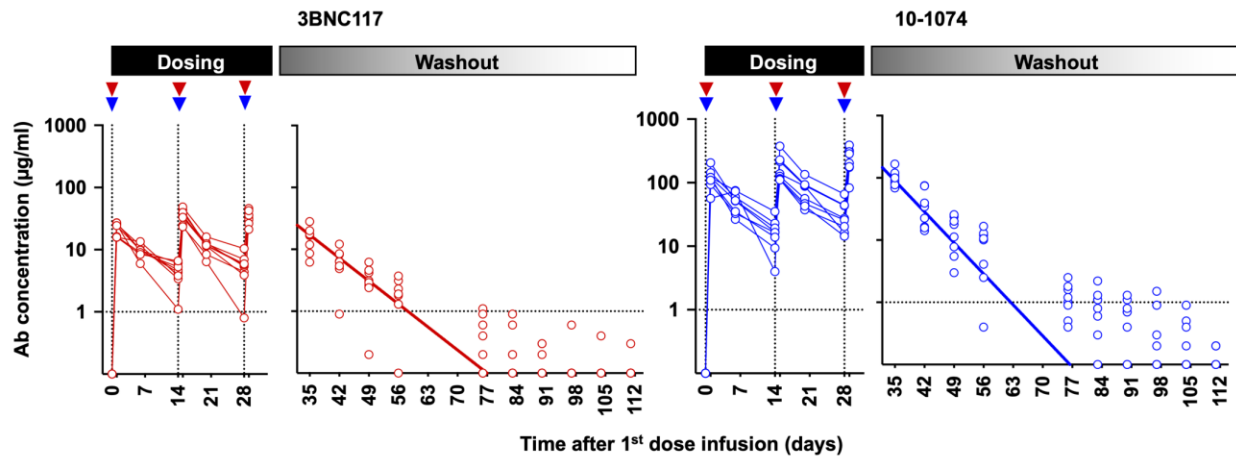

**Fig. S7. Pharmacokinetics of 10-1074 and 3BNC117.** In Study 2, plasma concentrations of 3BNC117 and 10-1074 were monitored during dosing (0 and 24 hours post dose) and during the washout period by TZM.bl assay.

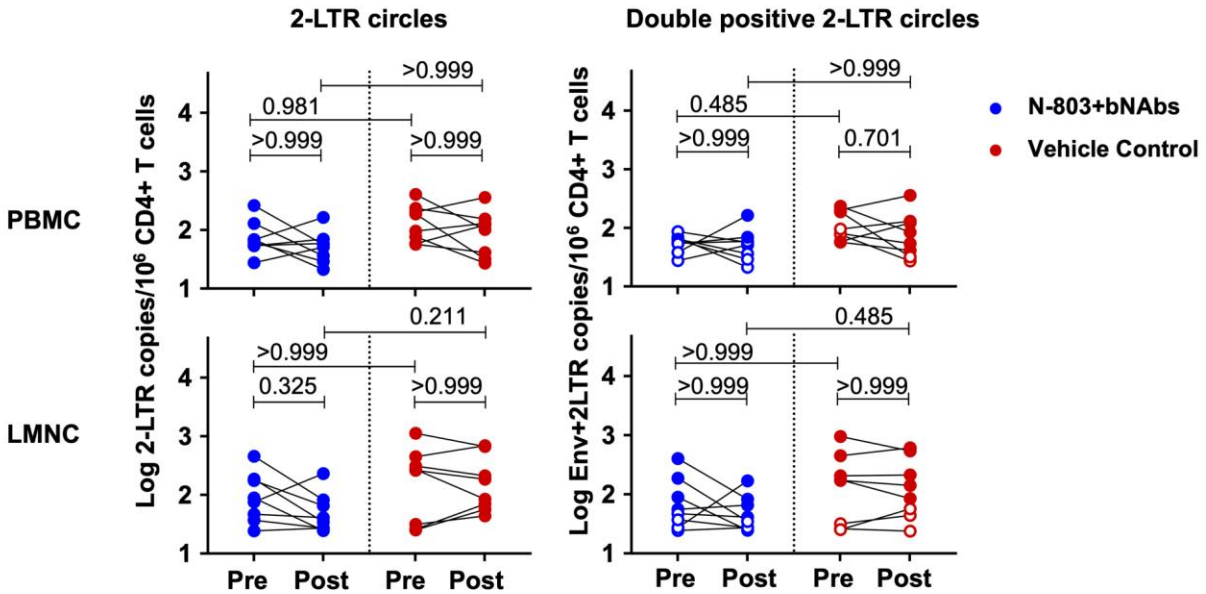

**Fig. S8. Comparisons of 2-LTR circles in CD4<sup>+</sup> T cells before and after treatment.** Levels of 2-LTR circles are expressed as log<sub>10</sub> copies per 10<sup>6</sup> CD4<sup>+</sup> T cells. 2-LTR circles and double positive 2-LTR circles were compared between groups using a Kruskal–Wallis *H* test at pre- and post-treatment timepoints. Values within each group were compared using a Wilcoxon matched-pairs signed-rank test. *P*-values were adjusted for multiple comparison by Dunn’s test.



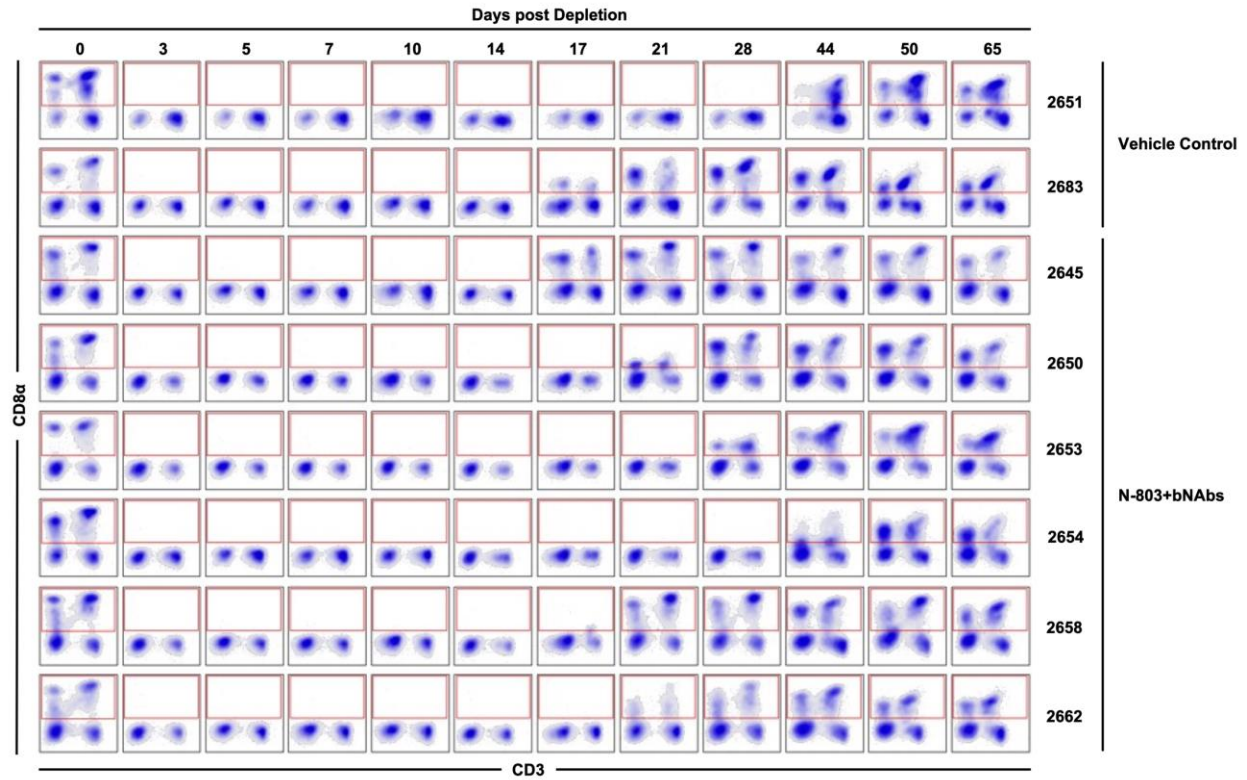

**Fig. S9. In vivo CD8 $\alpha$ <sup>+</sup> lymphocyte depletion.** CD8<sup>+</sup> lymphocytes were depleted in vivo using the MT807R1 monoclonal antibody in two control RMs and six aviremic RMs treated with N-803+10-1074+3BNC117. The presence of CD8<sup>+</sup> T cells in the peripheral blood was monitored by flow cytometry.

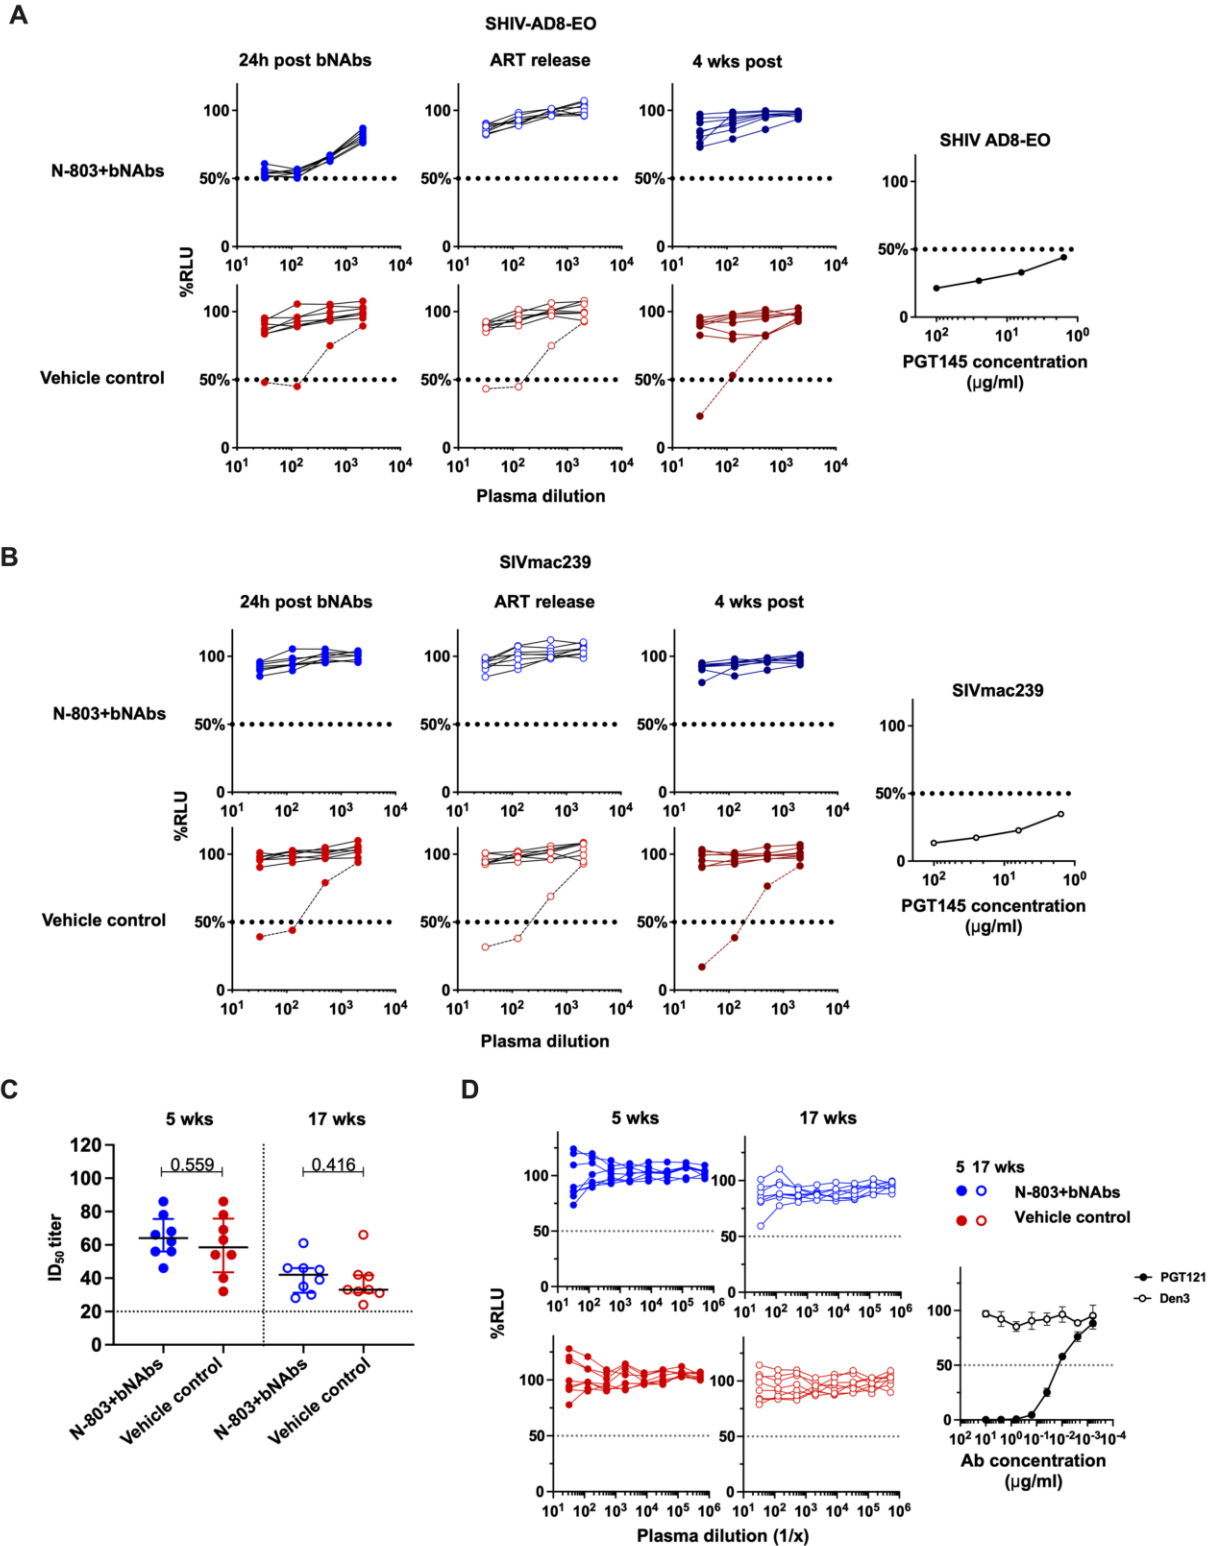

**Fig. S10. Antibody-dependent cell-mediated cytotoxicity (ADCC) activity.** In Study 2, (A) CEM.NKR-CCR5-sLTR-Luc cells were infected with SHIVAD8 (B) or SIVmac239 and incubated with an NK cell line expressing human CD16 at a 10:1 effector-to-target ratio with plasma isolated from RMs at three timepoints: 24 hours after the third bNAb dose, at the time of

ART discontinuation, and then 4 weeks after ART discontinuation. Plasma from animals administered N-803+10-1074+3BNC117 or formulation vehicle. ADCC activity was measured in relative light units (RLUs) in comparison to controls. Individual data points are means of triplicates. The dotted line indicates half-maximal lysis of infected cells. **(C)** Virus neutralization was measured using a luciferase-based assay in TZM.bl cells as ID<sub>50</sub> titer or **(D)** as %RLU (using serial dilutions of plasma isolated at 5 and 17 weeks after ART discontinuation).



presented as the difference in percent change between pre-treatment and post-treatment in each group. Comparison between groups was determined using a Mann–Whitney  $U$  test.

**A**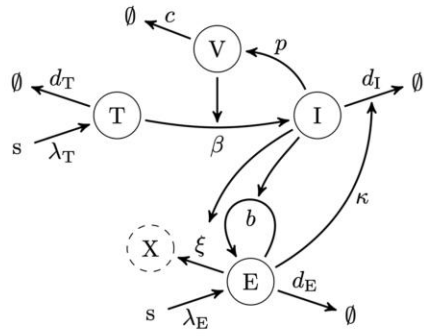**B**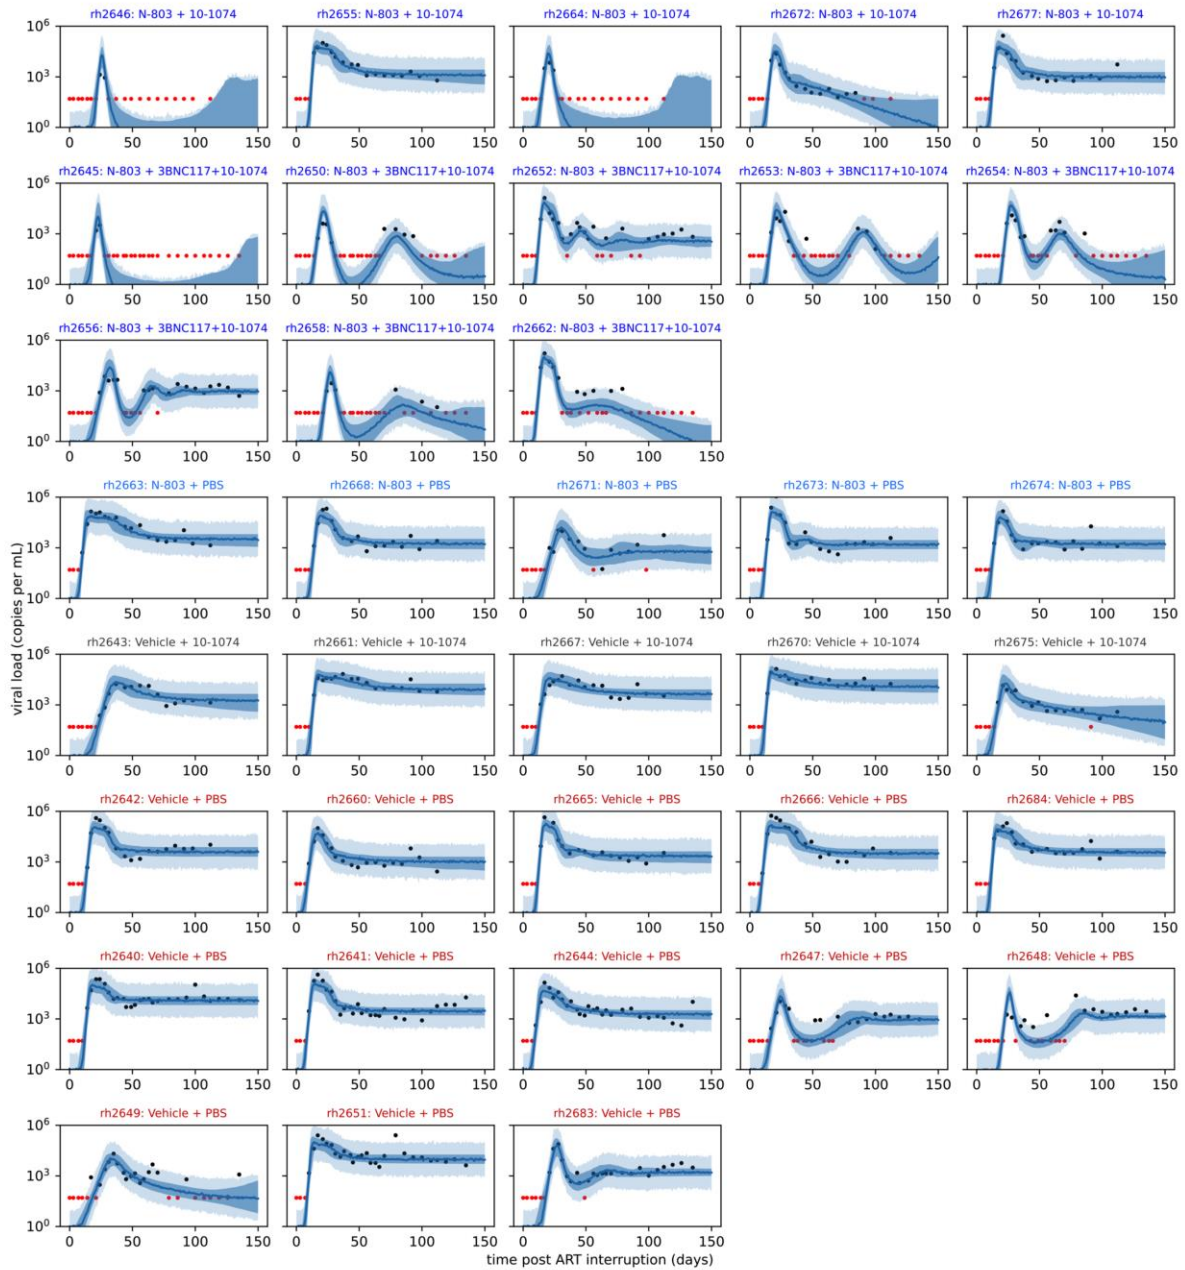

**Fig. S12. Representative model fits and a diagram of the mathematical model of treatment induced viral suppression.** (A) Diagram of the mathematical model. Target cells (T) are infected at a rate proportional to the number of infected cells (I). Infected cells are neutralized by effector cells (E), and they stimulate proliferation of effector cells. At high concentrations of infected cells, effector cells adopt an exhausted phenotype (X), which is not explicitly modeled. Additional parameters include target cell supply ( $\lambda_T$ ) and death ( $d_T$ ) rate; infected cell death ( $d_i$ ) and elimination by effector cells ( $\kappa E$ ); effector cell entrance ( $\lambda_E$ ), death ( $d_E$ ), maximum proliferation ( $b$ ), and maximum exhaustion ( $\xi$ ) rate; virion production ( $p$ ) and clearance ( $c$ );  $\beta$ , the infection rate constant;  $\kappa$ , the elimination rate constant. (B) Viral load trajectories of the fitted dynamical model. Shown are the viral load (VL) measurements following treatment interruption for each animal (black and red dots) and the fitted model predictions (blue curves and envelopes). The red dots indicate that the VL was below the limit of detection. To generate individual model trajectories and indicate their uncertainty for a given animal, we sample individual parameter values from the random effects distribution, conditional on the observed VL measurements. Using these samples, we generate an ensemble of likely trajectories. The blue curve is the median of this ensemble, and the dark blue envelope indicates the 2.5-to-97.5 percentiles. Using the ensemble of trajectories, we simulate VL measurements using a log-normal measurement error model. The 2.5-to-97.5 percentiles of these simulations are indicated by the light-blue envelopes.

**Table S1. 10-1074 plasma concentrations (µg/ml) at each dose.**

|               | <b>Study 1</b> |                      |                |                      |
|---------------|----------------|----------------------|----------------|----------------------|
| <b>Group</b>  | <b>10-1074</b> | <b>N-803+10-1074</b> | <b>10-1074</b> | <b>N-803+10-1074</b> |
| 24 hours post | first dose     | first dose           | second dose    | second dose          |
| Minimum       | 110            | 93.7                 | 170.4          | 35.3                 |
| <b>Median</b> | <b>134.6</b>   | <b>164.8</b>         | <b>220.5</b>   | <b>181.9</b>         |
| Maximum       | 194.1          | 181.8                | 495.7          | 230.5                |
| <b>Mean</b>   | <b>149.2</b>   | <b>149.1</b>         | <b>265.1</b>   | <b>150.3</b>         |
| SD            | 34.97          | 36.96                | 134.8          | 79.85                |



**Table S2. 10-1074 and 3BNC117 plasma concentrations ( $\mu\text{g/ml}$ ) at each dose.**

|               | <b>Study 2</b> |              |              |                |             |              |
|---------------|----------------|--------------|--------------|----------------|-------------|--------------|
| <b>bNAb</b>   | <b>3BNC117</b> |              |              | <b>10-1074</b> |             |              |
| 24 hours post | first dose     | second dose  | third dose   | first dose     | second dose | third dose   |
| Minimum       | 15.8           | 23.4         | 21.2         | 56.8           | 110.9       | 83           |
| <b>Median</b> | <b>25.1</b>    | <b>35.4</b>  | <b>34</b>    | <b>121</b>     | <b>132</b>  | <b>244.2</b> |
| Maximum       | 27.2           | 48.5         | 46           | 205.4          | 375.6       | 389.2        |
| <b>Mean</b>   | <b>22.26</b>   | <b>35.48</b> | <b>33.79</b> | <b>121.6</b>   | <b>178</b>  | <b>242.5</b> |
| SD            | 5.251          | 8.63         | 8.093        | 42.46          | 92.59       | 99.29        |

**Table S3. List of flow cytometry antibodies used for immune analysis.**

| <b>Antibody</b>             | <b>Clone</b> | <b>Fluorochrome</b> | <b>Manufacturer</b> | <b>Dilution</b> |
|-----------------------------|--------------|---------------------|---------------------|-----------------|
| Anti-Human CD3              | SP34-2       | AF700               | BD Bioscience       | 1:20            |
| Anti-Human CD3              | SP34-2       | BUV395              | BD Bioscience       | 1:20            |
| Anti-Human CD3              | SP34-2       | V450                | BD Bioscience       | 1:20            |
| Anti-Human CD4              | L200         | BV510               | BD Bioscience       | 1:100           |
| Anti-Human CD4              | L200         | BV711               | BD Bioscience       | 1:100           |
| Anti-Human CD8              | SK1          | APC-Cy7             | BD Bioscience       | 1:50            |
| Anti-Human CD8              | SK1          | APC-H7              | BD Bioscience       | 1:50            |
| Anti-Human CD16             | 3G8          | BV510               | BD Bioscience       | 1:50            |
| Anti-Human CD20             | 2H7          | BUV395              | BD Bioscience       | 1:50            |
| Anti-Human CD20             | 2H7          | BV570               | Biologend           | 1:50            |
| Anti-Human CD20             | 2H7          | BV650               | BD Bioscience       | 1:100           |
| Anti-Human CD25             | M-A251       | PE-Cy7              | BD Bioscience       | 1:20            |
| Anti-Human CD28             | CD28.2       | PE-CF594            | BD Bioscience       | 1:20            |
| Anti-Human CD28             | CD28.2       | PE-Cy7              | BD Bioscience       | 1:20            |
| Anti-Human CD28             | CD28.2       | PerCP-Cy5.5         | BD Bioscience       | 1:50            |
| Anti-NHP CD45               | D058-1283    | BUV737              | BD Bioscience       | 1:50            |
| Anti-NHP CD45               | D058-1283    | BV786               | BD Bioscience       | 1:100           |
| Anti-Human CD56             | NCAM16.2     | BV650               | BD Bioscience       | 1:20            |
| Anti-Human CD69             | TP1.55.3     | ECD                 | Beckman Coulter     | 1:20            |
| Anti-Human CD95             | DX2          | BV711               | BD Bioscience       | 1:50            |
| Anti-Human CD95             | DX2          | PE                  | BD Bioscience       | 1:50            |
| Anti-Human CD107a           | H4A3         | BV786               | BD Bioscience       | 1:20            |
| Anti-Human CD183<br>(CXCR3) | 1C6/CXCR3    | APC                 | BD Bioscience       | 1:50            |
| Anti-Human CD185<br>(CXCR5) | MU5UBEE      | PE-Cy7              | eBioscience         | 1:20            |
| Anti-Human CD197 (CCR7)     | 150503       | FITC                | BD Bioscience       | 1:20            |
| Anti-Human CD278 (ICOS)     | C398.4A      | PerCP-Cy5.5         | Biologend           | 1:200           |
| Anti-Human CD279 (PD-1)     | EH12.2H7     | BV421               | Biologend           | 1:50            |
| Anti-Human HLA-DR           | G46-6        | APC-H7              | BD Bioscience       | 1:80            |
| Anti-Human NKG2A            | Z199         | PE-Cy7              | Beckman Coulter     | 1:20            |
| Anti-Human NKG2D            | BAT221       | PE                  | Miltenyi Biotec     | 1:50            |
| Anti-Human NKp30            | REA823       | APC                 | Miltenyi Biotec     | 1:50            |
| Anti-Human NKp46            | BAB281       | PerCP-Cy5.5         | Beckman Coulter     | 1:50            |
| Anti-Human Granzyme B       | GB-11        | AF700               | BD Bioscience       | 1:50            |
| Anti-Human IFN- $\gamma$    | B27          | BUV395              | BD Bioscience       | 1:20            |
| Anti-Human IL-2             | MQ1-17H12    | APC                 | BD Bioscience       | 1:5             |
| Anti-Human TNF- $\alpha$    | Mab11        | BV650               | BD Bioscience       | 1:20            |
| LIVE/DEAD Fixable Aqua      |              |                     | Invitrogen          | 1:1000          |

## References and Notes

1. D. Finzi, J. Blankson, J. D. Siliciano, J. B. Margolick, K. Chadwick, T. Pierson, K. Smith, J. Lisziewicz, F. Lori, C. Flexner, T. C. Quinn, R. E. Chaisson, E. Rosenberg, B. Walker, S. Gange, J. Gallant, R. F. Siliciano, Latent infection of CD4<sup>+</sup> T cells provides a mechanism for lifelong persistence of HIV-1, even in patients on effective combination therapy. *Nat. Med.* **5**, 512–517 (1999). [doi:10.1038/8394](https://doi.org/10.1038/8394) [Medline](#)
2. L. Zhang, B. Ramratnam, K. Tenner-Racz, Y. He, M. Vesanen, S. Lewin, A. Talal, P. Racz, A. S. Perelson, B. T. Korber, M. Markowitz, D. D. Ho, Quantifying residual HIV-1 replication in patients receiving combination antiretroviral therapy. *N. Engl. J. Med.* **340**, 1605–1613 (1999). [doi:10.1056/NEJM199905273402101](https://doi.org/10.1056/NEJM199905273402101) [Medline](#)
3. T. W. Chun, R. T. Davey Jr., D. Engel, H. C. Lane, A. S. Fauci, Re-emergence of HIV after stopping therapy. *Nature* **401**, 874–875 (1999). [doi:10.1038/44755](https://doi.org/10.1038/44755) [Medline](#)
4. T. W. Chun, L. Carruth, D. Finzi, X. Shen, J. A. DiGiuseppe, H. Taylor, M. Hermankova, K. Chadwick, J. Margolick, T. C. Quinn, Y.-H. Kuo, R. Brookmeyer, M. A. Zeiger, P. Barditch-Crovo, R. F. Siliciano, Quantification of latent tissue reservoirs and total body viral load in HIV-1 infection. *Nature* **387**, 183–188 (1997). [doi:10.1038/387183a0](https://doi.org/10.1038/387183a0) [Medline](#)
5. T. W. Chun, L. Stuyver, S. B. Mizell, L. A. Ehler, J. A. M. Mican, M. Baseler, A. L. Lloyd, M. A. Nowak, A. S. Fauci, Presence of an inducible HIV-1 latent reservoir during highly active antiretroviral therapy. *Proc. Natl. Acad. Sci. U.S.A.* **94**, 13193–13197 (1997). [doi:10.1073/pnas.94.24.13193](https://doi.org/10.1073/pnas.94.24.13193) [Medline](#)
6. A. Sáez-Ciri3n, C. Bacchus, L. Hocqueloux, V. Avettand-Fenoel, I. Girault, C. Lecuroux, V. Potard, P. Versmisse, A. Melard, T. Prazuck, B. Descours, J. Guergnon, J.-P. Viard, F. Boufassa, O. Lambotte, C. Goujard, L. Meyer, D. Costagliola, A. Venet, G. Pancino, B. Autran, C. Rouzioux; ANRS VISCONTI Study Group, Post-treatment HIV-1 controllers with a long-term virological remission after the interruption of early initiated antiretroviral therapy ANRS VISCONTI Study. *PLOS Pathog.* **9**, e1003211 (2013). [doi:10.1371/journal.ppat.1003211](https://doi.org/10.1371/journal.ppat.1003211) [Medline](#)
7. K. Chamie, S. S. Chang, E. Kramolowsky, M. L. Gonzalgo, P. K. Agarwal, J. C. Bassett, M. Bjurlin, M. L. Cher, W. Clark, B. E. Cowan, R. David, E. Goldfischer, K. Guru, M. W. Jalkut, S. D. Kaffenberger, J. Kaminetsky, A. E. Katz, A. S. Koo, W. J. Sexton, S. N. Tikhonenkov, E. J. Trabulsi, A. F. Trainer, P. Spilman, M. Huang, P. Bhar, S. A. Taha, L. Sender, S. Reddy, P. Soon-Shiong, IL-15 superagonist NAI in BCG-unresponsive non-muscle-invasive bladder cancer. *NEJM Evid.* **2**, a2200167 (2023). [Medline](#)
8. J. B. McBrien, M. Mavigner, L. Franchitti, S. A. Smith, E. White, G. K. Tharp, H. Walum, K. Busman-Sahay, C. R. Aguilera-Sandoval, W. O. Thayer, R. A. Spagnuolo, M. Kovarova, A. Wahl, B. Cervasi, D. M. Margolis, T. H. Vanderford, D. G. Carnathan, M. Paiardini, J. D. Lifson, J. H. Lee, J. T. Safrit, S. E. Bosinger, J. D. Estes, C. A. Derdeyn, J. V. Garcia, D. A. Kulpa, A. Chahroudi, G. Silvestri, Robust and persistent reactivation of SIV and HIV by N-803 and depletion of CD8<sup>+</sup> cells. *Nature* **578**, 154–159 (2020). [doi:10.1038/s41586-020-1946-0](https://doi.org/10.1038/s41586-020-1946-0) [Medline](#)

9. J. S. Miller, Z. B. Davis, E. Helgeson, C. Reilly, A. Thorkelson, J. Anderson, N. S. Lima, S. Jorstad, G. T. Hart, J. H. Lee, J. T. Safrit, H. Wong, S. Cooley, L. Gharu, H. Chung, P. Soon-Shiong, C. Dobrowolski, C. V. Fletcher, J. Karn, D. C. Douek, T. W. Schacker, Safety and virologic impact of the IL-15 superagonist N-803 in people living with HIV: A phase 1 trial. *Nat. Med.* **28**, 392–400 (2022). [doi:10.1038/s41591-021-01651-9](https://doi.org/10.1038/s41591-021-01651-9) [Medline](#)
10. R. Romee, S. Cooley, M. M. Berrien-Elliott, P. Westervelt, M. R. Verneris, J. E. Wagner, D. J. Weisdorf, B. R. Blazar, C. Ustun, T. E. DeFor, S. Vivek, L. Peck, J. F. DiPersio, A. F. Cashen, R. Kylo, A. Musiek, A. Schaffer, M. J. Anadkat, I. Rosman, D. Miller, J. O. Egan, E. K. Jeng, A. Rock, H. C. Wong, T. A. Fehniger, J. S. Miller, First-in-human phase 1 clinical study of the IL-15 superagonist complex ALT-803 to treat relapse after transplantation. *Blood* **131**, 2515–2527 (2018). [doi:10.1182/blood-2017-12-823757](https://doi.org/10.1182/blood-2017-12-823757) [Medline](#)
11. Y. Nishimura, R. Gautam, T.-W. Chun, R. Sadjadpour, K. E. Foulds, M. Shingai, F. Klein, A. Gazumyan, J. Golijanin, M. Donaldson, O. K. Donau, R. J. Plishka, A. Buckler-White, M. S. Seaman, J. D. Lifson, R. A. Koup, A. S. Fauci, M. C. Nussenzweig, M. A. Martin, Early antibody therapy can induce long-lasting immunity to SHIV. *Nature* **543**, 559–563 (2017). [doi:10.1038/nature21435](https://doi.org/10.1038/nature21435) [Medline](#)
12. J. F. Scheid, J. A. Horwitz, Y. Bar-On, E. F. Kreider, C.-L. Lu, J. C. C. Lorenzi, A. Feldmann, M. Braunschweig, L. Nogueira, T. Oliveira, I. Shimeliovich, R. Patel, L. Burke, Y. Z. Cohen, S. Hadrigan, A. Settler, M. Witmer-Pack, A. P. West Jr., B. Juelg, T. Keler, T. Hawthorne, B. Zingman, R. M. Gulick, N. Pfeifer, G. H. Learn, M. S. Seaman, P. J. Bjorkman, F. Klein, S. J. Schlesinger, B. D. Walker, B. H. Hahn, M. C. Nussenzweig, M. Caskey, HIV-1 antibody 3BNC117 suppresses viral rebound in humans during treatment interruption. *Nature* **535**, 556–560 (2016). [doi:10.1038/nature18929](https://doi.org/10.1038/nature18929) [Medline](#)
13. Y. Nishimura, O. K. Donau, J. Dias, S. Ferrando-Martinez, E. Jesteadt, R. Sadjadpour, R. Gautam, A. Buckler-White, R. Geleziunas, R. A. Koup, M. C. Nussenzweig, M. A. Martin, Immunotherapy during the acute SHIV infection of macaques confers long-term suppression of viremia. *J. Exp. Med.* **218**, e20201214 (2021). [doi:10.1084/jem.20201214](https://doi.org/10.1084/jem.20201214) [Medline](#)
14. J. D. Gunst, M. H. Pahus, M. Rosás-Umbert, I.-N. Lu, T. Benfield, H. Nielsen, I. S. Johansen, R. Mohey, L. Østergaard, V. Klastrup, M. Khan, M. H. Schleimann, R. Olesen, H. Støvring, P. W. Denton, N. N. Kinloch, D. C. Copertino, A. R. Ward, W. D. C. Alberto, S. D. Nielsen, M. C. Puertas, V. Ramos, J. D. Reeves, C. J. Petropoulos, J. Martinez-Picado, Z. L. Brumme, R. B. Jones, J. Fox, M. Tolstrup, M. C. Nussenzweig, M. Caskey, S. Fidler, O. S. Søggaard, Early intervention with 3BNC117 and romidepsin at antiretroviral treatment initiation in people with HIV-1: A phase 1b/2a, randomized trial. *Nat. Med.* **28**, 2424–2435 (2022). [doi:10.1038/s41591-022-02023-7](https://doi.org/10.1038/s41591-022-02023-7) [Medline](#)
15. M. C. Sneller, J. Blazkova, J. S. Justement, V. Shi, B. D. Kennedy, K. Gittens, J. Tolstenko, G. McCormack, E. J. Whitehead, R. F. Schneck, M. A. Proschan, E. Benko, C. Kovacs, C. Oguz, M. S. Seaman, M. Caskey, M. C. Nussenzweig, A. S. Fauci, S. Moir, T.-W. Chun, Combination anti-HIV antibodies provide sustained virological suppression. *Nature* **606**, 375–381 (2022). [doi:10.1038/s41586-022-04797-9](https://doi.org/10.1038/s41586-022-04797-9) [Medline](#)

16. J. Niessl, A. E. Baxter, P. Mendoza, M. Jankovic, Y. Z. Cohen, A. L. Butler, C.-L. Lu, M. Dubé, I. Shimeliovich, H. Gruell, F. Klein, M. Caskey, M. C. Nussenzweig, D. E. Kaufmann, Combination anti-HIV-1 antibody therapy is associated with increased virus-specific T cell immunity. *Nat. Med.* **26**, 222–227 (2020). [doi:10.1038/s41591-019-0747-1](https://doi.org/10.1038/s41591-019-0747-1) [Medline](#)
17. M. Rosás-Umbert, J. D. Gunst, M. H. Pahus, R. Olesen, M. Schleimann, P. W. Denton, V. Ramos, A. Ward, N. N. Kinloch, D. C. Copertino, T. Escribà, A. Llano, Z. L. Brumme, R. Brad Jones, B. Mothe, C. Brander, J. Fox, M. C. Nussenzweig, S. Fidler, M. Caskey, M. Tolstrup, O. S. Sjøgaard, Administration of broadly neutralizing anti-HIV-1 antibodies at ART initiation maintains long-term CD8<sup>+</sup> T cell immunity. *Nat. Commun.* **13**, 6473 (2022). [doi:10.1038/s41467-022-34171-2](https://doi.org/10.1038/s41467-022-34171-2) [Medline](#)
18. C. Gaebler, L. Nogueira, E. Stoffel, T. Y. Oliveira, G. Breton, K. G. Millard, M. Turroja, A. Butler, V. Ramos, M. S. Seaman, J. D. Reeves, C. J. Petropoulos, I. Shimeliovich, A. Gazumyan, C. S. Jiang, N. Jilg, J. F. Scheid, R. Gandhi, B. D. Walker, M. C. Sneller, A. Fauci, T.-W. Chun, M. Caskey, M. C. Nussenzweig, Prolonged viral suppression with anti-HIV-1 antibody therapy. *Nature* **606**, 368–374 (2022). [doi:10.1038/s41586-022-04597-1](https://doi.org/10.1038/s41586-022-04597-1) [Medline](#)
19. J. B. Whitney, A. L. Hill, S. Sanisetty, P. Penaloza-MacMaster, J. Liu, M. Shetty, L. Parenteau, C. Cabral, J. Shields, S. Blackmore, J. Y. Smith, A. L. Brinkman, L. E. Peter, S. I. Mathew, K. M. Smith, E. N. Borducchi, D. I. S. Rosenbloom, M. G. Lewis, J. Hattersley, B. Li, J. Hesselgesser, R. Geleziunas, M. L. Robb, J. H. Kim, N. L. Michael, D. H. Barouch, Rapid seeding of the viral reservoir prior to SIV viraemia in rhesus monkeys. *Nature* **512**, 74–77 (2014). [doi:10.1038/nature13594](https://doi.org/10.1038/nature13594) [Medline](#)
20. A. Sáez-Cirión, S. Y. Shin, P. Versmisse, F. Barré-Sinoussi, G. Pancino, Ex vivo T cell-based HIV suppression assay to evaluate HIV-specific CD8<sup>+</sup> T-cell responses. *Nat. Protoc.* **5**, 1033–1041 (2010). [doi:10.1038/nprot.2010.73](https://doi.org/10.1038/nprot.2010.73) [Medline](#)
21. T. Schoofs, F. Klein, M. Braunschweig, E. F. Kreider, A. Feldmann, L. Nogueira, T. Oliveira, J. C. C. Lorenzi, E. H. Parrish, G. H. Learn, A. P. West Jr., P. J. Bjorkman, S. J. Schlesinger, M. S. Seaman, J. Czartoski, M. J. McElrath, N. Pfeifer, B. H. Hahn, M. Caskey, M. C. Nussenzweig, HIV-1 therapy with monoclonal antibody 3BNC117 elicits host immune responses against HIV-1. *Science* **352**, 997–1001 (2016). [doi:10.1126/science.aaf0972](https://doi.org/10.1126/science.aaf0972) [Medline](#)
22. M. Caskey, F. Klein, M. C. Nussenzweig, Broadly neutralizing anti-HIV-1 monoclonal antibodies in the clinic. *Nat. Med.* **25**, 547–553 (2019). [doi:10.1038/s41591-019-0412-8](https://doi.org/10.1038/s41591-019-0412-8) [Medline](#)
23. J. Blazkova, F. Gao, M. H. Marichanegowda, J. S. Justement, V. Shi, E. J. Whitehead, R. F. Schneck, E. D. Huiting, K. Gittens, M. Cottrell, E. Benko, C. Kovacs, J. Lack, M. C. Sneller, S. Moir, A. S. Fauci, T.-W. Chun, Distinct mechanisms of long-term virologic control in two HIV-infected individuals after treatment interruption of anti-retroviral therapy. *Nat. Med.* **27**, 1893–1898 (2021). [doi:10.1038/s41591-021-01503-6](https://doi.org/10.1038/s41591-021-01503-6) [Medline](#)
24. F. Lori, M. G. Lewis, J. Xu, G. Varga, D. E. Zinn Jr., C. Crabbs, W. Wagner, J. Greenhouse, P. Silvera, J. Yalley-Ogunro, C. Tinelli, J. Lisziewicz, Control of SIV rebound through

- structured treatment interruptions during early infection. *Science* **290**, 1591–1593 (2000). [doi:10.1126/science.290.5496.1591](https://doi.org/10.1126/science.290.5496.1591) [Medline](#)
25. H. J. Barbian, M. S. Seaton, S. D. Narasipura, J. Wallace, R. Rajan, B. E. Sha, L. Al-Harhi,  $\beta$ -catenin regulates HIV latency and modulates HIV reactivation. *PLOS Pathog.* **18**, e1010354 (2022). [doi:10.1371/journal.ppat.1010354](https://doi.org/10.1371/journal.ppat.1010354) [Medline](#)
26. J. Wallace, S. D. Narasipura, B. E. Sha, A. L. French, L. Al-Harhi, Canonical Wnts mediate CD8<sup>+</sup> T cell noncytolytic anti-HIV-1 activity and correlate with HIV-1 clinical status. *J. Immunol.* **205**, 2046–2055 (2020). [doi:10.4049/jimmunol.1801379](https://doi.org/10.4049/jimmunol.1801379) [Medline](#)
27. M. Zanoni, D. Palesch, C. Pinacchio, M. Statzu, G. K. Tharp, M. Paiardini, A. Chahroudi, S. E. Bosinger, J. Yoon, B. Cox, G. Silvestri, D. A. Kulpa, Innate, non-cytolytic CD8<sup>+</sup> T cell-mediated suppression of HIV replication by MHC-independent inhibition of virus transcription. *PLOS Pathog.* **16**, e1008821 (2020). [doi:10.1371/journal.ppat.1008821](https://doi.org/10.1371/journal.ppat.1008821) [Medline](#)
28. Y. Nishimura, M. Shingai, R. Willey, R. Sadjadpour, W. R. Lee, C. R. Brown, J. M. Brechley, A. Buckler-White, R. Petros, M. Eckhaus, V. Hoffman, T. Igarashi, M. A. Martin, Generation of the pathogenic R5-tropic simian/human immunodeficiency virus SHIVAD8 by serial passaging in rhesus macaques. *J. Virol.* **84**, 4769–4781 (2010). [doi:10.1128/JVI.02279-09](https://doi.org/10.1128/JVI.02279-09) [Medline](#)
29. L. J. Yant, T. C. Friedrich, R. C. Johnson, G. E. May, N. J. Maness, A. M. Enz, J. D. Lifson, D. H. O'Connor, M. Carrington, D. I. Watkins, The high-frequency major histocompatibility complex class I allele Mamu-B\*17 is associated with control of simian immunodeficiency virus SIVmac239 replication. *J. Virol.* **80**, 5074–5077 (2006). [doi:10.1128/JVI.80.10.5074-5077.2006](https://doi.org/10.1128/JVI.80.10.5074-5077.2006) [Medline](#)
30. B. R. Mothé, J. Weinfurter, C. Wang, W. Rehrauer, N. Wilson, T. M. Allen, D. B. Allison, D. I. Watkins, Expression of the major histocompatibility complex class I molecule Mamu-A\*01 is associated with control of simian immunodeficiency virus SIVmac239 replication. *J. Virol.* **77**, 2736–2740 (2003). [doi:10.1128/JVI.77.4.2736-2740.2003](https://doi.org/10.1128/JVI.77.4.2736-2740.2003) [Medline](#)
31. J. T. Loffredo, J. Maxwell, Y. Qi, C. E. Glidden, G. J. Borchardt, T. Soma, A. T. Bean, D. R. Beal, N. A. Wilson, W. M. Rehrauer, J. D. Lifson, M. Carrington, D. I. Watkins, Mamu-B\*08-positive macaques control simian immunodeficiency virus replication. *J. Virol.* **81**, 8827–8832 (2007). [doi:10.1128/JVI.00895-07](https://doi.org/10.1128/JVI.00895-07) [Medline](#)
32. D. C. Montefiori, Evaluating neutralizing antibodies against HIV, SIV, and SHIV in luciferase reporter gene assays. *Curr. Protoc. Immunol.* **Chapter 12**, 12.11.1–12.11.17 (2005). [doi:10.1002/0471142735.im1211s64](https://doi.org/10.1002/0471142735.im1211s64) [Medline](#)
33. J. B. Whitney, S.-Y. Lim, C. E. Osuna, J. L. Kublin, E. Chen, G. Yoon, P.-T. Liu, P. Abbink, E. N. Borducci, A. Hill, M. G. Lewis, R. Geleziunas, M. L. Robb, N. L. Michael, D. H. Barouch, Prevention of SIVmac251 reservoir seeding in rhesus monkeys by early antiretroviral therapy. *Nat. Commun.* **9**, 5429 (2018). [doi:10.1038/s41467-018-07881-9](https://doi.org/10.1038/s41467-018-07881-9) [Medline](#)

34. C. J. Pitcher, S. I. Hagen, J. M. Walker, R. Lum, B. L. Mitchell, V. C. Maino, M. K. Axthelm, L. J. Picker, Development and homeostasis of T cell memory in rhesus macaque. *J. Immunol.* **168**, 29–43 (2002). [doi:10.4049/jimmunol.168.1.29](https://doi.org/10.4049/jimmunol.168.1.29) [Medline](#)
35. M. Sarzotti-Kelsoe, R. T. Bailer, E. Turk, C. L. Lin, M. Bilska, K. M. Greene, H. Gao, C. A. Todd, D. A. Ozaki, M. S. Seaman, J. R. Mascola, D. C. Montefiori, Optimization and validation of the TZM-bl assay for standardized assessments of neutralizing antibodies against HIV-1. *J. Immunol. Methods* **409**, 131–146 (2014). [doi:10.1016/j.jim.2013.11.022](https://doi.org/10.1016/j.jim.2013.11.022) [Medline](#)
36. Y. Nishimura, R. Sadjadpour, J. J. Mattapallil, T. Igarashi, W. Lee, A. Buckler-White, M. Roederer, T.-W. Chun, M. A. Martin, High frequencies of resting CD4+ T cells containing integrated viral DNA are found in rhesus macaques during acute lentivirus infections. *Proc. Natl. Acad. Sci. U.S.A.* **106**, 8015–8020 (2009). [doi:10.1073/pnas.0903022106](https://doi.org/10.1073/pnas.0903022106) [Medline](#)
37. A. M. Bender, F. R. Simonetti, M. R. Kumar, E. J. Fray, K. M. Bruner, A. E. Timmons, K. Y. Tai, K. M. Jenike, A. A. R. Antar, P.-T. Liu, Y.-C. Ho, D. N. Raugi, M. Seydi, G. S. Gottlieb, A. A. Okoye, G. Q. Del Prete, L. J. Picker, J. L. Mankowski, J. D. Lifson, J. D. Siliciano, G. M. Laird, D. H. Barouch, J. E. Clements, R. F. Siliciano, The Landscape of Persistent Viral Genomes in ART-Treated SIV, SHIV, and HIV-2 Infections. *Cell Host Microbe* **26**, 73–85.e4 (2019). [doi:10.1016/j.chom.2019.06.005](https://doi.org/10.1016/j.chom.2019.06.005) [Medline](#)
38. K. M. Bruner, Z. Wang, F. R. Simonetti, A. M. Bender, K. J. Kwon, S. Sengupta, E. J. Fray, S. A. Beg, A. A. R. Antar, K. M. Jenike, L. N. Bertagnolli, A. A. Capoferri, J. T. Kufera, A. Timmons, C. Nobles, J. Gregg, N. Wada, Y.-C. Ho, H. Zhang, J. B. Margolick, J. N. Blankson, S. G. Deeks, F. D. Bushman, J. D. Siliciano, G. M. Laird, R. F. Siliciano, A quantitative approach for measuring the reservoir of latent HIV-1 proviruses. *Nature* **566**, 120–125 (2019). [doi:10.1038/s41586-019-0898-8](https://doi.org/10.1038/s41586-019-0898-8) [Medline](#)
39. D. M. Margolis, Eradication therapies for HIV Infection: Time to begin again. *AIDS Res. Hum. Retroviruses* **27**, 347–353 (2011). [doi:10.1089/aid.2011.0017](https://doi.org/10.1089/aid.2011.0017) [Medline](#)
40. J. E. Schmitz, M. A. Simon, M. J. Kuroda, M. A. Lifton, M. W. Ollert, C.-W. Vogel, P. Racz, K. Tenner-Racz, B. J. Scallon, M. Dalesandro, J. Ghayeb, E. P. Rieber, V. G. Sasseville, K. A. Reimann, A nonhuman primate model for the selective elimination of CD8+ lymphocytes using a mouse-human chimeric monoclonal antibody. *Am. J. Pathol.* **154**, 1923–1932 (1999). [doi:10.1016/S0002-9440\(10\)65450-8](https://doi.org/10.1016/S0002-9440(10)65450-8) [Medline](#)
41. M. M. Donaldson, S.-F. Kao, L. Eslamizar, C. Gee, G. Koopman, M. Lifton, J. E. Schmitz, A. W. Sylwester, A. Wilson, N. Hawkins, S. G. Self, M. Roederer, K. E. Foulds, Optimization and qualification of an 8-color intracellular cytokine staining assay for quantifying T cell responses in rhesus macaques for pre-clinical vaccine studies. *J. Immunol. Methods* **386**, 10–21 (2012). [doi:10.1016/j.jim.2012.08.011](https://doi.org/10.1016/j.jim.2012.08.011) [Medline](#)
42. M. D. Alpert, L. N. Heyer, D. E. J. Williams, J. D. Harvey, T. Greenough, M. Allhorn, D. T. Evans, A novel assay for antibody-dependent cell-mediated cytotoxicity against HIV-1- or SIV-infected cells reveals incomplete overlap with antibodies measured by neutralization and binding assays. *J. Virol.* **86**, 12039–12052 (2012). [doi:10.1128/JVI.01650-12](https://doi.org/10.1128/JVI.01650-12) [Medline](#)

43. M. S. Seaman, D. F. Leblanc, L. E. Grandpre, M. T. Bartman, D. C. Montefiori, N. L. Letvin, J. R. Mascola, Standardized assessment of NAb responses elicited in rhesus monkeys immunized with single- or multi-clade HIV-1 envelope immunogens. *Virology* **367**, 175–186 (2007). [doi:10.1016/j.virol.2007.05.024](https://doi.org/10.1016/j.virol.2007.05.024) [Medline](#)
44. A. S. Perelson, A. U. Neumann, M. Markowitz, J. M. Leonard, D. D. Ho, HIV-1 dynamics in vivo: Virion clearance rate, infected cell life-span, and viral generation time. *Science* **271**, 1582–1586 (1996). [doi:10.1126/science.271.5255.1582](https://doi.org/10.1126/science.271.5255.1582) [Medline](#)
45. J. M. Conway, A. S. Perelson, Post-treatment control of HIV infection. *Proc. Natl. Acad. Sci. U.S.A.* **112**, 5467–5472 (2015). [doi:10.1073/pnas.1419162112](https://doi.org/10.1073/pnas.1419162112) [Medline](#)
46. R. J. De Boer, A. S. Perelson, Towards a general function describing T cell proliferation. *J. Theor. Biol.* **175**, 567–576 (1995). [doi:10.1006/jtbi.1995.0165](https://doi.org/10.1006/jtbi.1995.0165) [Medline](#)
47. A. Mayer, Y. Zhang, A. S. Perelson, N. S. Wingreen, Regulation of T cell expansion by antigen presentation dynamics. *Proc. Natl. Acad. Sci. U.S.A.* **116**, 5914–5919 (2019). [doi:10.1073/pnas.1812800116](https://doi.org/10.1073/pnas.1812800116) [Medline](#)
48. R. W. Sanders, R. Derking, A. Cupo, J.-P. Julien, A. Yasmeen, N. de Val, H. J. Kim, C. Blattner, A. T. de la Peña, J. Korzun, M. Golabek, K. de Los Reyes, T. J. Ketas, M. J. van Gils, C. R. King, I. A. Wilson, A. B. Ward, P. J. Klasse, J. P. Moore, A next-generation cleaved, soluble HIV-1 Env trimer, BG505 SOSIP.664 gp140, expresses multiple epitopes for broadly neutralizing but not non-neutralizing antibodies. *PLOS Pathog.* **9**, e1003618 (2013). [doi:10.1371/journal.ppat.1003618](https://doi.org/10.1371/journal.ppat.1003618) [Medline](#)
